# Supplementary material
Source: PubMed Central journal article supplement (PMC10112864)
Supplement: mmc1.pdf [file mmc1.pdf]

# THE LANCET Microbe

## Supplementary appendix

This appendix formed part of the original submission and has been peer reviewed. We post it as supplied by the authors.

Supplement to: Galmiche S, Cortier T, Charmet T, et al. SARS-CoV-2 incubation period across variants of concern, individual factors, and circumstances of infection in France: a case series analysis from the ComCor study. *Lancet Microbe* 2023; published online April 18. [https://doi.org/10.1016/S2666-5247\(23\)00005-8](https://doi.org/10.1016/S2666-5247(23)00005-8).

## Appendix

### **SARS-CoV-2 incubation period across variants of concern, individual factors, and circumstances of infection in France: a cross-sectional analysis of the ComCor study**

|                                                                                                                                                                                                                                                                                       |    |
|---------------------------------------------------------------------------------------------------------------------------------------------------------------------------------------------------------------------------------------------------------------------------------------|----|
| Table S1: Demographic characteristics of participants depending on the variant responsible for infection .....                                                                                                                                                                        | 2  |
| Table S2: Deviance information criterion (DIC) for various models fitted to data on incubation period .....                                                                                                                                                                           | 3  |
| Table S3: Estimation of parameters $p_1$ (probability to report an incubation period of 7 days when the true incubation period duration is 6 or 8 days) and $p_2$ (probability to report an incubation period of 7 days when the true incubation period duration is 5 or 9 days)..... | 3  |
| Table S4: Parameters of the gamma distribution of the model describing the incubation period corrected for days 5-9 .....                                                                                                                                                             | 3  |
| Table S5: Factors associated with the incubation period in univariable and multivariable analyses, including type of interaction environment .....                                                                                                                                    | 4  |
| Table S6: Factors associated with the incubation period in multivariable linear regression averaged over 15 resamplings of incubation periods of 7 days and assigned to figures between 5 and 9 following probabilities derived from the gamma distribution .....                     | 6  |
| Table S7: Factors associated with the incubation period in univariable and multivariable Poisson regression analyses .....                                                                                                                                                            | 7  |
| Table S8: Comparison of estimated incubation period durations after transformation of the coefficients of the linear regression and the Poisson models.....                                                                                                                           | 9  |
| Table S9: Description of study population, linear regression model of factors associated with the incubation period in univariable and multivariable analyses when restricted to participants who report a positive test in the index case.....                                       | 10 |
| Supplementary methods .....                                                                                                                                                                                                                                                           | 12 |

**Table S1: Demographic characteristics of participants depending on the variant responsible for infection**

| <b>Variant</b>                        | <b>Historical strain</b> | <b>Alpha</b> | <b>Beta/Gamma</b> | <b>Delta</b> | <b>Omicron</b> | <b>Total</b>         |
|---------------------------------------|--------------------------|--------------|-------------------|--------------|----------------|----------------------|
| <b>Total</b>                          | <b>7539</b>              | <b>5133</b>  | <b>453</b>        | <b>4606</b>  | <b>2682</b>    | <b>20413</b>         |
| <b>Female</b>                         | 5072 (67.3%)             | 3455 (67.3%) | 288 (63.6%)       | 3043 (66.1%) | 1902 (70.9%)   | <b>13760 (67.4%)</b> |
| <b>Age (years)</b>                    |                          |              |                   |              |                |                      |
| 18-29                                 | 1625 (21.6%)             | 1129 (22.0%) | 94 (20.8%)        | 740 (16.1%)  | 681 (25.4%)    | <b>4269 (20.9%)</b>  |
| 30-39                                 | 1982 (26.3%)             | 1367 (26.6%) | 129 (28.5%)       | 1235 (26.8%) | 813 (30.3%)    | <b>5526 (27.1%)</b>  |
| 40-49                                 | 1517 (20.1%)             | 1097 (21.4%) | 108 (23.8%)       | 979 (21.3%)  | 534 (19.9%)    | <b>4235 (20.8%)</b>  |
| 50-59                                 | 1279 (17.0%)             | 882 (17.2%)  | 60 (13.3%)        | 866 (18.8%)  | 349 (13.0%)    | <b>3436 (16.8%)</b>  |
| 60-69                                 | 861 (11.4%)              | 520 (10.1%)  | 48 (10.6%)        | 575 (12.5%)  | 224 (8.4%)     | <b>2228 (10.9%)</b>  |
| ≥70                                   | 275 (3.7%)               | 138 (2.7%)   | 14 (3.1%)         | 211 (4.6%)   | 81 (3.0%)      | <b>719 (3.5%)</b>    |
| <b>Healthcare worker</b>              | 1247 (16.5%)             | 592 (11.5%)  | 60 (13.2%)        | 547 (11.9%)  | 320 (11.9%)    | <b>2766 (13.6%)</b>  |
| <b>Smoking status</b>                 |                          |              |                   |              |                |                      |
| Non-smoker, no nicotine substitution  | 6284 (83.4%)             | 4104 (80.0%) | 356 (78.6%)       | 3635 (78.9%) | 2086 (77.8%)   | <b>16465 (80.7%)</b> |
| Non-smoker, nicotine substitution     | 64 (0.9%)                | 40 (0.8%)    | 6 (1.3%)          | 37 (0.8%)    | 22 (0.8%)      | <b>169 (0.8%)</b>    |
| Non-smoker, electronic cigarette only | 248 (3.3%)               | 223 (4.3%)   | 9 (2.0%)          | 203 (4.4%)   | 118 (4.4%)     | <b>801 (3.9%)</b>    |
| <10 cigarettes/day                    | 478 (6.3%)               | 405 (7.9%)   | 47 (10.4%)        | 386 (8.4%)   | 221 (8.2%)     | <b>1537 (7.5%)</b>   |
| 10-20 cigarettes/day                  | 327 (4.3%)               | 243 (4.7%)   | 27 (6.0%)         | 248 (5.4%)   | 174 (6.5%)     | <b>1019 (5.0%)</b>   |
| >20 cigarettes/day                    | 138 (1.8%)               | 117 (2.3%)   | 8 (1.8%)          | 97 (2.1%)    | 61 (2.3%)      | <b>422 (2.1%)</b>    |
| <b>Underlying conditions</b>          |                          |              |                   |              |                |                      |
| Chronic respiratory disease           | 630 (8.4%)               | 443 (8.6%)   | 37 (8.2%)         | 350 (7.6%)   | 206 (7.7%)     | <b>1666 (8.2%)</b>   |
| Hypertension                          | 627 (8.3%)               | 417 (8.1%)   | 30 (6.6%)         | 426 (9.3%)   | 157 (5.9%)     | <b>1657 (8.1%)</b>   |
| Underweight                           | 236 (3.1%)               | 149 (2.9%)   | 8 (1.8%)          | 165 (3.6%)   | 109 (4.1%)     | <b>667 (3.3%)</b>    |
| Diabetes                              | 173 (2.3%)               | 109 (2.1%)   | 6 (1.3%)          | 117 (2.5%)   | 54 (2.0%)      | <b>459 (2.3%)</b>    |
| Coronary artery disease               | 73 (1.0%)                | 30 (0.6%)    | 4 (0.9%)          | 38 (0.8%)    | 20 (0.8%)      | <b>165 (0.8%)</b>    |

Legend: COVID-19 cases with identified incubation period and variant included via an online study in France (October 2020-February 2022).

**Table S2: Deviance information criterion (DIC) for various models fitted to data on incubation period**

| Model                              | DIC      | DIC(pois $p_1$ )-DIC |
|------------------------------------|----------|----------------------|
| Poisson + $p_1$                    | 86127.92 | 0                    |
| Negative-Binomial + $p_1$          | 85203.79 | 924.13               |
| Log-Normal + $p_1$                 | 84887.01 | 1240.91              |
| Gamma + $p_1$                      | 84565.98 | 1561.94              |
| Poisson + ( $p_1, p_2$ )           | 86091.53 | 36.39                |
| Negative-Binomial + ( $p_1, p_2$ ) | 85187.08 | 940.84               |
| Log-Normal + ( $p_1, p_2$ )        | 84790.74 | 1337.18              |
| Gamma + ( $p_1, p_2$ )             | 84522.35 | 1605.57              |

Legend: Probability models fitted using a Monte Carlo Markov Chains (MCMC) algorithm to the distribution of the incubation periods in the 20413 COVID-19 cases with identified incubation period and variant.

**Table S3: Estimation of parameters  $p_1$  (probability to report an incubation period of 7 days when the true incubation period duration is 6 or 8 days) and  $p_2$  (probability to report an incubation period of 7 days when the true incubation period duration is 5 or 9 days)**

| Parameter | Estimation (95% credible interval) |
|-----------|------------------------------------|
| $p_1$     | 0.25 (0.22-0.28)                   |
| $p_2$     | 0.09 (0.06-0.11)                   |

Legend:  $p_1$  and  $p_2$  were estimated jointly with the parameters of the gamma distribution using a Monte Carlo Markov Chains algorithm.

**Table S4: Parameters of the gamma distribution of the model describing the incubation period corrected for days 5-9**

| Variant           | Mean (95% credible interval) | Standard deviation (95% credible interval) |
|-------------------|------------------------------|--------------------------------------------|
| Historical strain | 4.07 (4.03-4.12)             | 2.12 (2.08-2.16)                           |
| Alpha             | 4.42 (4.35-4.48)             | 2.30 (2.25-2.36)                           |
| Beta or Gamma     | 4.66 (4.42-4.91)             | 2.65 (2.44-2.91)                           |
| Delta             | 3.89 (3.83-3.95)             | 2.06 (2.01-2.11)                           |
| Omicron           | 3.09 (3.02-3.15)             | 1.64 (1.59-1.70)                           |

Legend: Correction for days 5-9 was done using parameters  $p_1$  (probability to report an incubation period of 7 days when the true incubation period duration is 6 or 8 days) and  $p_2$  (probability to report an incubation period of 7 days when the true incubation period duration is 5 or 9 days)

**Table S5: Factors associated with the incubation period in univariable and multivariable analyses, including type of interaction environment**

|                                               | N            | %    | Univariable analysis |                         | Multivariable analysis |                         |
|-----------------------------------------------|--------------|------|----------------------|-------------------------|------------------------|-------------------------|
|                                               |              |      | Coefficient          | 95% confidence interval | Coefficient            | 95% confidence interval |
| <b>Total</b>                                  | <b>20413</b> |      |                      |                         |                        |                         |
| <b>Female</b>                                 | 13760        | 67.4 | 0.04                 | 0.03 ; 0.1              | 0.1                    | 0.02 ; 0.2              |
| <b>Variant</b>                                |              |      |                      |                         |                        |                         |
| Historical variant                            | 7539         | 36.9 | 0 (ref)              | ..                      | 0 (ref)                | ..                      |
| Alpha                                         | 5133         | 25.1 | 0.4                  | 0.3 ; 0.4               | 0.4                    | 0.3 ; 0.4               |
| Beta or Gamma                                 | 453          | 2.2  | 0.6                  | 0.5 ; 0.8               | 0.6                    | 0.3 ; 0.8               |
| Delta                                         | 4606         | 22.6 | - 0.2                | - 0.3 ; - 0.1           | - 0.1                  | - 0.2 ; 0.02            |
| Omicron                                       | 2682         | 13.1 | - 1.0                | - 1.1 ; - 0.9           | - 0.9                  | - 1.0 ; - 0.8           |
| <b>Age (years)</b>                            |              |      |                      |                         |                        |                         |
| 18-29                                         | 4269         | 20.9 | 0 (ref)              | ..                      | 0 (ref)                | ..                      |
| 30-39                                         | 5526         | 27.1 | 0.1                  | - 0.01 ; 0.2            | 0.1                    | - 0.02 ; 0.1            |
| 40-49                                         | 4235         | 20.7 | 0.2                  | 0.1 ; 0.3               | 0.2                    | 0.1 ; 0.3               |
| 50-59                                         | 3436         | 16.8 | 0.2                  | 0.1 ; 0.3               | 0.2                    | 0.1 ; 0.3               |
| 60-69                                         | 2228         | 10.9 | 0.4                  | 0.3 ; 0.5               | 0.4                    | 0.3 ; 0.5               |
| ≥70                                           | 719          | 3.5  | 0.3                  | 0.1 ; 0.5               | 0.4                    | 0.2 ; 0.5               |
| <b>Smoking status</b>                         |              |      |                      |                         |                        |                         |
| Non-smoker, no nicotine substitution          | 16465        | 80.7 | 0 (ref)              | ..                      | 0 (ref)                | ..                      |
| Non-smoker, nicotine substitution             | 169          | 0.8  | - 0.2                | - 0.5 ; 0.2             | - 0.2                  | - 0.5 ; 0.2             |
| Non-smoker, electronic cigarette only         | 801          | 3.9  | 0.1                  | - 0.1 ; 0.3             | 0.2                    | 0.0 ; 0.3               |
| <10 cigarettes/day                            | 1537         | 7.5  | 0.1                  | - 0.04 ; 0.2            | 0.2                    | 0.03 ; 0.3              |
| 10-20 cigarettes/day                          | 1019         | 5.0  | 0.2                  | 0.02 ; 0.3              | 0.2                    | 0.1 ; 0.4               |
| >20 cigarettes/day                            | 422          | 2.1  | 0.3                  | 0.1 ; 0.5               | 0.4                    | 0.1 ; 0.6               |
| <b>Vaccine status</b>                         |              |      |                      |                         |                        |                         |
| Unvaccinated                                  | 13868        | 67.9 | 0 (ref)              | ..                      | 0 (ref)                | ..                      |
| One dose <90 days since last injection        | 354          | 1.7  | - 0.2                | - 0.5 ; 0.0             | - 0.2                  | - 0.4 ; 0.1             |
| One dose 90-179 days since last injection     | 143          | 0.7  | - 0.9                | - 1.3 ; - 0.6           | - 0.3                  | - 0.7 ; 0.1             |
| One dose ≥180 days since last injection       | 97           | 0.5  | - 1.0                | - 1.4 ; - 0.6           | - 0.5                  | - 0.9 ; - 0.1           |
| Two doses <90 days since last injection       | 642          | 3.2  | - 0.2                | - 0.4 ; - 0.1           | 0.1                    | - 0.1 ; 0.3             |
| Two doses 90-179 days since last injection    | 3266         | 16.0 | - 0.6                | - 0.7 ; - 0.5           | - 0.1                  | - 0.3 ; - 0.02          |
| Two doses ≥180 days since last injection      | 942          | 4.6  | - 0.7                | - 0.8 ; - 0.5           | - 0.2                  | - 0.4 ; - 0.05          |
| Three doses <90 days since last injection     | 903          | 4.4  | - 0.8                | - 0.1 ; - 0.7           | 0.0                    | - 0.2 ; 0.2             |
| Three doses 90-179 days since last injection  | 42           | 0.2  | - 0.8                | - 1.5 ; - 0.2           | - 0.3                  | - 0.9 ; 0.3             |
| Three doses ≥180 days since last injection    | 16           | 0.1  | - 1.2                | - 2.3 ; - 0.1           | - 0.6                  | - 1.3 ; 0.1             |
| Four doses <90 days since last injection      | 3            | 0.01 | - 0.4                | - 2.3 ; 2.1             | 0.5                    | - 2.4 ; 3.4             |
| Undated last dose of vaccine                  | 137          | 0.7  | - 0.2                | - 0.6 ; 0.2             | 0.2                    | - 0.3 ; 0.7             |
| <b>Past episode of SARS-CoV-2 infection</b>   |              |      |                      |                         |                        |                         |
| No                                            | 19744        | 96.7 | 0 (ref)              | ..                      | 0 (ref)                | ..                      |
| Yes, virologically or serologically confirmed | 512          | 2.5  | - 0.5                | - 0.7 ; - 0.3           | 0.0                    | - 0.2 ; 0.2             |
| Yes, diagnosed on clinical evaluation only    | 157          | 0.8  | - 0.1                | - 0.5 ; 0.2             | 0.0                    | - 0.4 ; 0.3             |
| <b>Symptoms in index case</b>                 | 6819         | 33.4 | - 0.1                | - 0.2 ; - 0.1           | - 0.1                  | - 0.2 ; - 0.1           |

|                                        | N    | %    | Univariable analysis |                         | Multivariable analysis |                         |
|----------------------------------------|------|------|----------------------|-------------------------|------------------------|-------------------------|
|                                        |      |      | Coefficient          | 95% confidence interval | Coefficient            | 95% confidence interval |
| <b>Type of interaction environment</b> |      |      |                      |                         |                        |                         |
| Family                                 | 7656 | 37.5 | 0 (ref)              | ..                      | 0 (ref)                | ..                      |
| Friends                                | 6526 | 32.0 | - 0.2                | - 0.3 ; - 0.2           | - 0.2                  | - 0.3 ; - 0.1           |
| Professional                           | 4367 | 21.4 | 0.1                  | 0.0 ; 0.2               | 0.03                   | - 0.1 ; 0.1             |
| School/university                      | 231  | 1.1  | 0.04                 | - 0.3 ; 0.3             | 0.1                    | - 0.2 ; 0.4             |
| Sports activity                        | 357  | 1.7  | - 0.2                | - 0.5 ; 0.03            | - 0.1                  | - 0.3 ; 0.1             |
| Cultural activity                      | 146  | 0.7  | - 0.2                | - 0.6 ; 0.2             | - 0.1                  | - 0.5 ; 0.2             |
| Religious activity                     | 31   | 0.2  | 0.4                  | - 0.4 ; 1.2             | 0.6                    | - 0.3 ; 1.4             |
| Healthcare                             | 172  | 0.8  | 0.1                  | - 0.3 ; 0.4             | 0.2                    | - 0.2 ; 0.6             |
| Other environment                      | 927  | 4.5  | 0.03                 | - 0.1 ; 0.2             | 0.0                    | - 0.2 ; 0.2             |

Legend: Multivariable analysis is adjusted on all variables presented in the table.

**Table S6: Factors associated with the incubation period in multivariable linear regression averaged over 15 resamplings of incubation periods of 7 days and assigned to figures between 5 and 9 following probabilities derived from the gamma distribution**

|                                               | <b>Coefficient</b> | <b>95% confidence interval</b> |
|-----------------------------------------------|--------------------|--------------------------------|
| <b>Female</b>                                 | 0.1                | 0.02 ; 0.1                     |
| <b>Variant</b>                                |                    |                                |
| Historical variant                            | 0 (ref)            | ..                             |
| Alpha                                         | 0.3                | 0.3 ; 0.4                      |
| Beta or Gamma                                 | 0.6                | 0.3 ; 0.8                      |
| Delta                                         | - 0.1              | - 0.2 ; 0.03                   |
| Omicron                                       | - 0.9              | - 1.0 ; - 0.7                  |
| <b>Age (years)</b>                            |                    |                                |
| 18-29                                         | 0 (ref)            | ..                             |
| 30-39                                         | 0.1                | 0.0 ; 0.2                      |
| 40-49                                         | 0.2                | 0.1 ; 0.3                      |
| 50-59                                         | 0.2                | 0.1 ; 0.3                      |
| 60-69                                         | 0.4                | 0.3 ; 0.5                      |
| ≥70                                           | 0.4                | 0.2 ; 0.6                      |
| <b>Smoking status</b>                         |                    |                                |
| Non-smoker, no nicotine substitution          | 0 (ref)            | ..                             |
| Non-smoker, nicotine substitution             | - 0.2              | - 0.5 ; 0.2                    |
| Non-smoker, electronic cigarette only         | 0.2                | 0.0 ; 0.3                      |
| <10 cigarettes/day                            | 0.1                | 0.02 ; 0.2                     |
| 10-20 cigarettes/day                          | 0.2                | 0.1 ; 0.4                      |
| >20 cigarettes/day                            | 0.4                | 0.1 ; 0.6                      |
| <b>Vaccine status</b>                         |                    |                                |
| Unvaccinated                                  | 0 (ref)            | ..                             |
| One dose <90 days since last injection        | - 0.2              | - 0.4 ; 0.1                    |
| One dose 90-179 days since last injection     | - 0.3              | - 0.7 ; 0.1                    |
| One dose ≥180 days since last injection       | - 0.5              | - 0.9 ; - 0.1                  |
| Two doses <90 days since last injection       | 0.1                | - 0.1 ; 0.3                    |
| Two doses 90-179 days since last injection    | - 0.1              | - 0.3 ; - 0.02                 |
| Two doses ≥180 days since last injection      | - 0.2              | - 0.4 ; - 0.05                 |
| Three doses <90 days since last injection     | 0.0                | - 0.2 ; 0.2                    |
| Three doses 90-179 days since last injection  | - 0.3              | - 0.9 ; 0.3                    |
| Three doses ≥180 days since last injection    | - 0.6              | - 1.3 ; 0.0                    |
| Four doses <90 days since last injection      | 0.6                | - 2.3 ; 3.3                    |
| Undated last dose of vaccine                  | 0.2                | - 0.3 ; 0.7                    |
| <b>Past episode of SARS-CoV-2 infection</b>   |                    |                                |
| No                                            | 0 (ref)            | ..                             |
| Yes, virologically or serologically confirmed | 0.0                | - 0.2 ; 0.2                    |
| Yes, diagnosed on clinical evaluation only    | 0.0                | - 0.4 ; 0.4                    |
| <b>Symptoms in index case</b>                 | - 0.1              | - 0.2 ; - 0.05                 |
| <b>Mask-wearing</b>                           |                    |                                |
| Neither participant or index case             | 0 (ref)            | ..                             |
| Index case only                               | 0.0                | - 0.2 ; 0.2                    |
| Participant only                              | 0.2                | 0.1 ; 0.3                      |
| Both participant and index case               | 0.1                | 0.02 ; 0.2                     |

**Table S7: Factors associated with the incubation period in univariable and multivariable Poisson regression analyses**

|                                               | Univariable analysis |                         | Multivariable analysis |                         |
|-----------------------------------------------|----------------------|-------------------------|------------------------|-------------------------|
|                                               | Coefficient          | 95% confidence interval | Coefficient            | 95% confidence interval |
| <b>Female</b>                                 | 1.01                 | 0.99 ; 1.02             | 1.02                   | 1.01 ; 1.03             |
| <b>Variant</b>                                |                      |                         |                        |                         |
| Historical variant                            | 1 (ref)              | ..                      | 1 (ref)                | ..                      |
| Alpha                                         | 1.08                 | 1.06 ; 1.09             | 1.08                   | 1.06 ; 1.09             |
| Beta or Gamma                                 | 1.12                 | 1.07 ; 1.18             | 1.12                   | 1.07 ; 1.18             |
| Delta                                         | 0.96                 | 0.94 ; 0.98             | 0.98                   | 0.96 ; 1.01             |
| Omicron                                       | 0.78                 | 0.77 ; 0.80             | 0.80                   | 0.77 ; 0.83             |
| <b>Age (years)</b>                            |                      |                         |                        |                         |
| 18-29                                         | 1 (ref)              | ..                      | 1 (ref)                | ..                      |
| 30-39                                         | 1.02                 | 1.00 ; 1.04             | 1.02                   | 1.00 ; 1.04             |
| 40-49                                         | 1.05                 | 1.03 ; 1.07             | 1.05                   | 1.02 ; 1.07             |
| 50-59                                         | 1.05                 | 1.03 ; 1.08             | 1.05                   | 1.02 ; 1.07             |
| 60-69                                         | 1.09                 | 1.06 ; 1.12             | 1.09                   | 1.06 ; 1.12             |
| ≥70                                           | 1.07                 | 1.03 ; 1.11             | 1.09                   | 1.04 ; 1.13             |
| <b>Smoking status</b>                         |                      |                         |                        |                         |
| Non-smoker, no nicotine substitution          | 1 (ref)              | ..                      | 1 (ref)                | ..                      |
| Non-smoker, nicotine substitution             | 0.97                 | 0.90 ; 1.04             | 0.96                   | 0.89 ; 1.04             |
| Non-smoker, electronic cigarette only         | 1.02                 | 0.98 ; 1.06             | 1.03                   | 1.00 ; 1.07             |
| <10 cigarettes/day                            | 1.02                 | 0.99 ; 1.04             | 1.03                   | 1.00 ; 1.06             |
| 10-20 cigarettes/day                          | 1.04                 | 1.00 ; 1.07             | 1.05                   | 1.02 ; 1.09             |
| >20 cigarettes/day                            | 1.06                 | 1.01 ; 1.12             | 1.08                   | 1.03 ; 1.13             |
| <b>Vaccine status</b>                         |                      |                         |                        |                         |
| Unvaccinated                                  | 1 (ref)              | ..                      | 1 (ref)                | ..                      |
| One dose <90 days since last injection        | 0.95                 | 0.90 ; 1.01             | 0.96                   | 0.91 ; 1.01             |
| One dose 90-179 days since last injection     | 0.80                 | 0.73 ; 0.88             | 0.92                   | 0.83 ; 0.92             |
| One dose ≥180 days since last injection       | 0.77                 | 0.70 ; 0.85             | 0.88                   | 0.80 ; 0.98             |
| Two doses <90 days since last injection       | 0.95                 | 0.91 ; 0.99             | 1.03                   | 0.99 ; 1.07             |
| Two doses 90-179 days since last injection    | 0.87                 | 0.85 ; 0.89             | 0.97                   | 0.94 ; 0.99             |
| Two doses ≥180 days since last injection      | 0.86                 | 0.83 ; 0.89             | 0.95                   | 0.92 ; 0.99             |
| Three doses <90 days since last injection     | 0.83                 | 0.80 ; 0.85             | 1.01                   | 0.97 ; 1.05             |
| Three doses 90-179 days since last injection  | 0.83                 | 0.70 ; 0.97             | 0.94                   | 0.80 ; 1.09             |
| Three doses ≥180 days since last injection    | 0.75                 | 0.62 ; 0.91             | 0.86                   | 0.70 ; 1.04             |
| Four doses <90 days since last injection      | 0.92                 | 0.49 ; 1.70             | 1.15                   | 0.60 ; 2.20             |
| Undated last dose of vaccine                  | 0.96                 | 0.86 ; 1.07             | 1.05                   | 0.95 ; 1.17             |
| <b>Past episode of SARS-CoV-2 infection</b>   |                      |                         |                        |                         |
| No                                            | 1 (ref)              | ..                      | 1 (ref)                | ..                      |
| Yes, virologically or serologically confirmed | 0.89                 | 0.85 ; 0.94             | 1.00                   | 0.95 ; 1.06             |
| Yes, diagnosed on clinical evaluation only    | 0.98                 | 0.90 ; 1.06             | 1.00                   | 0.92 ; 1.08             |



|                                    | Univariable analysis |                         | Multivariable analysis |                         |
|------------------------------------|----------------------|-------------------------|------------------------|-------------------------|
|                                    | Coefficient          | 95% confidence interval | Coefficient            | 95% confidence interval |
| <b>Symptoms in index case</b>      | 0.97                 | 0.96 ; 0.99             | 0.97                   | 0.96 ; 0.99             |
| <b>Mask-wearing</b>                |                      |                         |                        |                         |
| Neither participant nor index case | 1 (ref)              | ..                      | 1 (ref)                | ..                      |
| Index case only                    | 1.01                 | 0.96 ; 1.06             | 1.00                   | 0.95 ; 1.05             |
| Participant only                   | 1.08                 | 1.04 ; 1.10             | 1.05                   | 1.03 ; 1.08             |
| Both participant and index case    | 1.05                 | 1.03 ; 1.08             | 1.03                   | 1.01 ; 1.05             |

Legend: Multivariable analysis is adjusted on all variables presented in the table. Underlying conditions and indoors/outdoors setting variables were dropped from the multivariable model given absence of statistical significance.

**Table S8: Comparison of estimated incubation period durations after transformation of the coefficients of the linear regression and the Poisson models.**

| <b>Model</b>                                  | <b>Estimated incubation period</b> |                |
|-----------------------------------------------|------------------------------------|----------------|
|                                               | <b>Linear regression</b>           | <b>Poisson</b> |
| <b>Male</b>                                   | 4.5                                | 4.5            |
| <b>Female</b>                                 | 4.6                                | 4.6            |
| <b>Variant</b>                                |                                    |                |
| Historical                                    | 4.6                                | 4.6            |
| Alpha                                         | 5.0                                | 5.0            |
| Beta or Gamma                                 | 5.2                                | 5.2            |
| Delta                                         | 4.5                                | 4.5            |
| Omicron                                       | 3.7                                | 3.7            |
| <b>Age</b>                                    |                                    |                |
| 18-29                                         | 4.4                                | 4.4            |
| 30-39                                         | 4.5                                | 4.5            |
| 40-49                                         | 4.6                                | 4.6            |
| 50-59                                         | 4.6                                | 4.6            |
| 60-69                                         | 4.8                                | 4.8            |
| ≥70                                           | 4.8                                | 4.8            |
| <b>Smoking status</b>                         |                                    |                |
| Non-smoker, no nicotine substitution          | 4.5                                | 4.5            |
| Non-smoker, nicotine substitution             | 4.4                                | 4.4            |
| Non-smoker, electronic cigarette only         | 4.7                                | 4.7            |
| <10 cigarettes/day                            | 4.7                                | 4.7            |
| 10-20 cigarettes/day                          | 4.8                                | 4.8            |
| >20 cigarettes/day                            | 4.9                                | 4.9            |
| <b>Vaccine status</b>                         |                                    |                |
| Unvaccinated                                  | 4.7                                | 4.7            |
| One dose <90 days since last injection        | 4.5                                | 4.5            |
| One dose 90-179 days since last injection     | 4.4                                | 4.3            |
| One dose ≥180 days since last injection       | 4.2                                | 4.2            |
| Two doses <90 days since last injection       | 4.9                                | 4.9            |
| Two doses 90-179 days since last injection    | 4.6                                | 4.6            |
| Two doses ≥180 days since last injection      | 4.5                                | 4.5            |
| Three doses <90 days since last injection     | 4.7                                | 4.8            |
| Three doses 90-179 days since last injection  | 4.4                                | 4.4            |
| Three doses ≥180 days since last injection    | 4.1                                | 4.0            |
| Four doses <90 days since last injection      | 5.3                                | 5.4            |
| Undated last dose of vaccine                  | 5.0                                | 5.0            |
| <b>Past episode of SARS-CoV-2 infection</b>   |                                    |                |
| No                                            | 4.6                                | 4.6            |
| Yes, virologically or serologically confirmed | 4.6                                | 4.6            |
| Yes, diagnosed on clinical evaluation only    | 4.5                                | 4.5            |
| <b>Symptoms in index case</b>                 |                                    |                |
| No                                            | 4.6                                | 4.6            |
| Yes                                           | 4.5                                | 4.5            |
| <b>Mask-wearing</b>                           |                                    |                |
| Neither participant or index case             | 4.5                                | 4.5            |
| Index case only                               | 4.5                                | 4.5            |
| Participant only                              | 4.7                                | 4.7            |
| Both participant and index case               | 4.6                                | 4.6            |

Legend: Coefficients of respective models are described in tables 3 and S7.

**Table S9: Description of study population, linear regression model of factors associated with the incubation period in univariable and multivariable analyses when restricted to participants who report a positive test in the index case**

|                                               | N            | %     | Univariable analysis |                         | Multivariable analysis |                         |
|-----------------------------------------------|--------------|-------|----------------------|-------------------------|------------------------|-------------------------|
|                                               |              |       | Coefficient          | 95% confidence interval | Coefficient            | 95% confidence interval |
| <b>Total</b>                                  | <b>18005</b> |       |                      |                         |                        |                         |
| <b>Female</b>                                 | 12238        | 68.0  | 0.1                  | 0.0 ; 0.1               | 0.1                    | 0.1 ; 0.2               |
| <b>Variant</b>                                |              |       |                      |                         |                        |                         |
| Historical variant                            | 6619         | 36.8  | 0 (ref)              | ..                      | 0 (ref)                | ..                      |
| Alpha                                         | 4642         | 25.8  | 0.3                  | 0.3 ; 0.4               | 0.3                    | 0.3 ; 0.4               |
| Beta or Gamma                                 | 408          | 2.3   | 0.6                  | 0.3 ; 0.8               | 0.6                    | 0.3 ; 0.8               |
| Delta                                         | 3918         | 21.8  | -0.2                 | -0.3 ; -0.1             | -0.1                   | -0.2 ; 0.02             |
| Omicron                                       | 2418         | 13.4  | -1.0                 | -1.1 ; -0.9             | -0.8                   | -1.0 ; -0.7             |
| <b>Age (years)</b>                            |              |       |                      |                         |                        |                         |
| 18-29                                         | 3852         | 21.4  | 0 (ref)              | ..                      | 0 (ref)                | ..                      |
| 30-39                                         | 4974         | 27.6  | 0.1                  | -0.01 ; 0.2             | 0.1                    | -0.01 ; 0.2             |
| 40-49                                         | 3699         | 20.5  | 0.2                  | 0.1 ; 0.3               | 0.2                    | 0.1 ; 0.3               |
| 50-59                                         | 2977         | 16.5  | 0.2                  | 0.1 ; 0.3               | 0.2                    | 0.1 ; 0.3               |
| 60-69                                         | 1908         | 10.6  | 0.4                  | 0.3 ; 0.5               | 0.4                    | 0.3 ; 0.5               |
| ≥70                                           | 595          | 3.3   | 0.3                  | 0.1 ; 0.5               | 0.4                    | 0.2 ; 0.6               |
| <b>Smoking status</b>                         |              |       |                      |                         |                        |                         |
| Non-smoker, no nicotine substitution          | 14480        | 80.4  | 0 (ref)              | ..                      | 0 (ref)                | ..                      |
| Non-smoker, nicotine substitution             | 143          | 0.8   | -0.1                 | -0.5 ; 0.3              | -0.2                   | -0.5 ; 0.2              |
| Non-smoker, electronic cigarette only         | 713          | 4.0   | 0.1                  | -0.1 ; 0.3              | 0.1                    | -0.02 ; 0.3             |
| <10 cigarettes/day                            | 1380         | 7.7   | 0.1                  | -0.02 ; 0.2             | 0.2                    | 0.03 ; 0.3              |
| 10-20 cigarettes/day                          | 921          | 5.1   | 0.2                  | 0.04 ; 0.4              | 0.3                    | 0.1 ; 0.4               |
| >20 cigarettes/day                            | 368          | 2.0   | 0.3                  | 0.03 ; 0.5              | 0.3                    | 0.1 ; 0.6               |
| <b>Vaccine status</b>                         |              |       |                      |                         |                        |                         |
| Unvaccinated                                  | 12298        | 68.30 | 0 (ref)              | ..                      | 0 (ref)                | ..                      |
| One dose <90 days since last injection        | 320          | 1.78  | -0.2                 | -0.5 ; 0.1              | -0.1                   | -0.4 ; 0.1              |
| One dose 90-179 days since last injection     | 131          | 0.73  | -1.0                 | -1.3 ; -0.6             | -0.4                   | -0.8 ; -0.05            |
| One dose ≥180 days since last injection       | 85           | 0.47  | -1.2                 | -1.6 ; -0.9             | -0.7                   | -1.1 ; -0.3             |
| Two doses <90 days since last injection       | 541          | 3.00  | -0.3                 | -0.5 ; -0.1             | 0.1                    | -0.1 ; 0.3              |
| Two doses 90-179 days since last injection    | 2841         | 15.78 | -0.6                 | -0.7 ; -0.5             | -0.2                   | -0.3 ; -0.03            |
| Two doses ≥180 days since last injection      | 815          | 4.53  | -0.7                 | -0.9 ; -0.6             | -0.3                   | -0.4 ; -0.1             |
| Three doses <90 days since last injection     | 812          | 4.51  | -0.9                 | -1.0 ; -0.7             | -0.1                   | -0.2 ; 0.1              |
| Three doses 90-179 days since last injection  | 36           | 0.20  | -0.9                 | -1.6 ; -0.3             | -0.4                   | -1.0 ; 0.2              |
| Three doses ≥180 days since last injection    | 15           | 0.08  | -1.2                 | -1.9 ; -0.4             | -0.6                   | -1.4 ; 0.1              |
| Four doses <90 days since last injection      | 3            | 0.02  | -0.4                 | -3.1 ; 2.3              | 0.4                    | -2.5 ; 3.3              |
| Undated last dose of vaccine                  | 108          | 0.60  | -0.1                 | -0.7 ; 0.4              | 0.3                    | -0.2 ; 0.8              |
| <b>Past episode of SARS-CoV-2 infection</b>   |              |       |                      |                         |                        |                         |
| No                                            | 17395        | 96.6  | 0 (ref)              | ..                      |                        |                         |
| Yes, virologically or serologically confirmed | 473          | 2.6   | -0.5                 | -0.7 ; -0.3             | 0.1                    | -0.1 ; 0.3              |
| Yes, diagnosed on clinical evaluation only    | 137          | 0.8   | -0.1                 | -0.5 ; 0.3              | 0.0                    | -0.4 ; 0.4              |
| <b>Symptoms in index case</b>                 | 6023         | 33.5  | -0.2                 | -0.2 ; -0.1             | -0.1                   | -0.2 ; -0.1             |

|                                   | N     | %    | Univariable analysis |                         | Multivariable analysis |                         |
|-----------------------------------|-------|------|----------------------|-------------------------|------------------------|-------------------------|
|                                   |       |      | Coefficient          | 95% confidence interval | Coefficient            | 95% confidence interval |
| <b>Mask-wearing</b>               |       |      |                      |                         |                        |                         |
| Neither participant or index case | 14370 | 79.8 | 0 (ref)              | ..                      | 0 (ref)                | ..                      |
| Index case only                   | 407   | 2.3  | 0.1                  | - 0.1 ; 0.3             | 0.1                    | - 0.2 ; 0.3             |
| Participant only                  | 1350  | 7.5  | 0.3                  | 0.2 ; 0.4               | 0.2                    | 0.1 ; 0.3               |
| Both participant and index case   | 1878  | 10.4 | 0.2                  | 0.1 ; 0.3               | 0.1                    | 0.01 ; 0.2              |
| <b>Indoors/outdoors setting</b>   |       |      |                      |                         |                        |                         |
| Indoors with closed windows       | 13369 | 74.3 | 0 (ref)              | ..                      | ..                     | ..                      |
| Indoors with open windows         | 3584  | 19.9 | 0                    | - 0.1 ; 0.1             | ..                     | ..                      |
| Outdoors                          | 1052  | 5.8  | 0.1                  | - 0.1 ; 0.2             | ..                     | ..                      |
| <b>Underlying conditions</b>      |       |      |                      |                         |                        |                         |
| Chronic respiratory disease       | 1425  | 7.9  | 0.1                  | - 0.03 ; 0.2            | ..                     | ..                      |
| Hypertension                      | 1397  | 7.8  | 0.2                  | 0.03 ; 0.3              | ..                     | ..                      |
| Underweight                       | 590   | 3.3  | - 0.3                | - 0.4 ; - 0.1           | ..                     | ..                      |
| Diabetes                          | 385   | 2.1  | 0.1                  | - 0.2 ; 0.3             | ..                     | ..                      |
| Coronary artery disease           | 138   | 0.8  | - 0.1                | - 0.4 ; 0.3             | ..                     | ..                      |

Legend: The population represented 18005 out of the 20413 (88.2%) participants (2059, 10.1% did not know if the index case had tested positive, the remaining 349, 1.7%, did not report a positive test in the index case despite identifying them as such). Multivariable analysis is adjusted on all variables presented in the table except underlying conditions which were dropped from the model given absence of statistical significance.

## Supplementary methods

### Incubation Model

- $X$  is the random variable of reported incubation periods
- $Y$  is the random variable of latent incubation periods following either a Poisson, Negative-binomial, discretised Log-normal or Gamma law.

### The log-likelihood

$$LL = (\sum_{i,j} N_{i,j} \log(P(X = i, \theta_j, p_1, p_2)))$$

$N_{i,j}$  is the number of cases with an incubation period of  $i$  days for variant  $j$

$\theta_j$  is the set of parameters for the  $j$ th variant

$P(p_1) = 1$  if  $p_1 \in [0,1]$  and 0 otherwise

$P(p_2) = 1$  if  $p_2 \in [0,1]$  and 0 otherwise

### Probabilities for reported incubation periods

- $\forall k \in N_+ \setminus \{5,6,7,8,9\}: P(X = k, \theta_j, p_1, p_2) = P(Y = k, \theta_j)$
- $P(X = 7, \theta_j, p_1, p_2) = P(Y = 7, \theta_j) + p_1 (P(Y = 6, \theta_j) + P(Y = 8, \theta_j)) + p_2 (P(Y = 5, \theta_j) + P(Y = 9, \theta_j))$
- $k \in \{6, 8\}: P(X = k, \theta_j, p_1, p_2) = (1 - p_1) P(Y = k, \theta_j)$
- $k \in \{5, 9\}: P(X = k, \theta_j, p_1, p_2) = (1 - p_2) P(Y = k, \theta_j)$

### Questionnaire phrasing

French original phrasing:

“Les questions suivantes concernent la personne à l’origine de votre contamination.” “Combien de jours se sont passés entre votre dernier contact avec cette personne et l’apparition de vos symptômes ?”

English translation:

“The following questions refer to the person at the origin of your contamination.” “How many days went by between your last contact with that person and the onset of your symptoms?”

*Number between 1 and 99 required as a response.*
